# Supplementary material
Source: PubMed Central journal article supplement (PMC4480218)
Supplement: NIHMS685990-supplement-10.pdf [file NIHMS685990-supplement-10.pdf]

## **Supplemental Information Inventory**

**Title: Cdk1 Activates Pre-Mitotic Nuclear Envelope Dynein Recruitment and Apical Nuclear Migration in Neural Stem cells**

- Five supplemental figures
- Nine supplemental movies
- Supplemental figure legends
- Supplemental experimental procedures
